# Supplementary material
Source: publisher figshare collection journal article supplement (https://acs.figshare.com/ndownloader/files/13308725)
Supplement: Supplementary file 1 [file 13308725]

Electronic supporting information for

# **AgInS<sub>2</sub>-Coated Upconversion Nanoparticle as a Photocatalyst for Near-Infrared Light Activated Photodynamic Therapy of Cancer Cells**

Swarup Kumar Maji, <sup>\*,†,‡</sup> Dong Ha Kim <sup>\*,†,§</sup>

<sup>†</sup>Department of Chemistry and Nano Science, Division of Molecular and Life Sciences, College of Natural Sciences, Ewha Womans University, Seoul 03760, Korea.

Email: [dhkim@ewha.ac.kr](mailto:dhkim@ewha.ac.kr)

<sup>‡</sup>Department of Chemistry, Khatra Adibasi Mahavidyalaya, Khatra 722140, West Bengal, India. Email: [maji\\_swarup@yahoo.in](mailto:maji_swarup@yahoo.in)

<sup>§</sup>State Key Laboratory of Molecular Engineering of Polymers, Fudan University, Shanghai 200433, China.

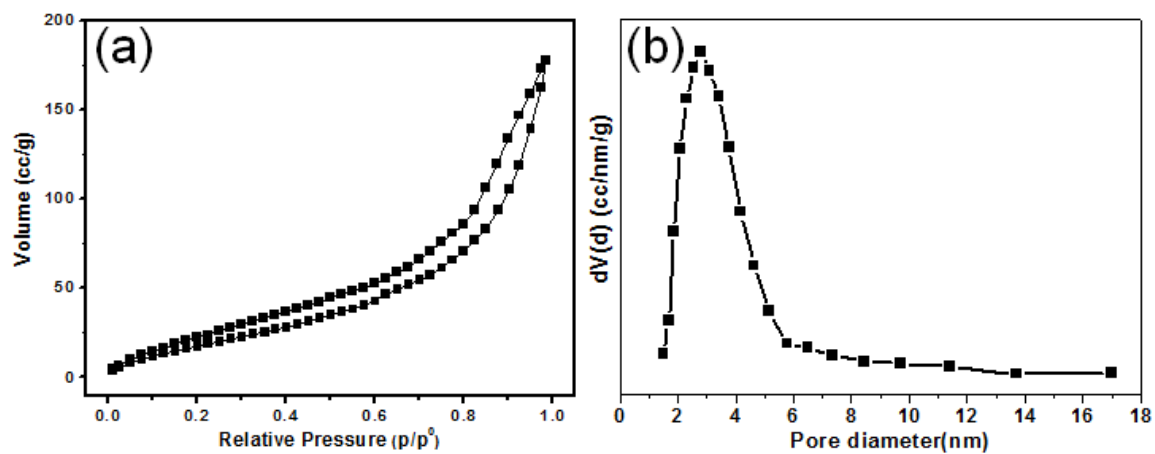

**Figure S1.** (a) BET isotherms, and (b) pore size distribution curves of UCN@AIS NPs.

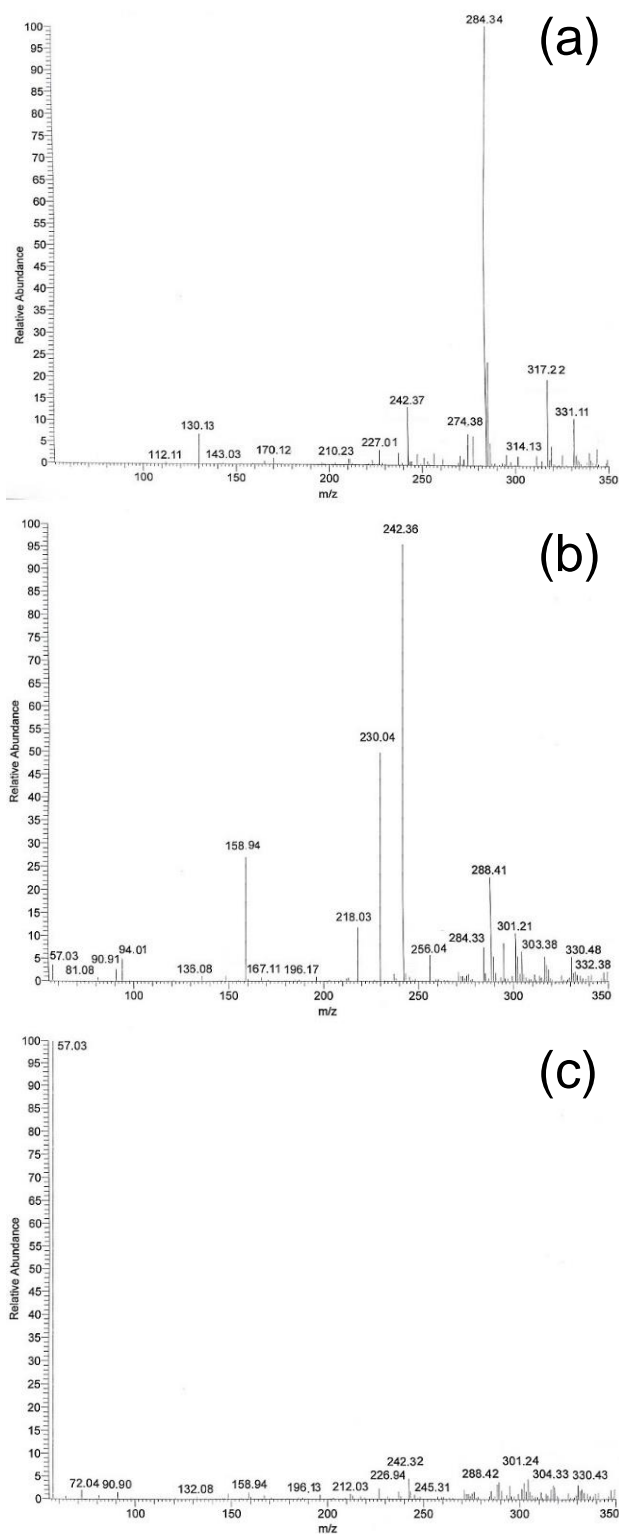

**Figure S2.** LCMS spectra of MB solution: (a) before photocatalysis, (b) during the photocatalysis (4 h), and (c) after photocatalysis (9 h) in presence of UCN@AIS NPs.
